# Supplementary material
Source: publisher figshare collection journal article supplement (https://tandf.figshare.com/ndownloader/files/17504939)
Supplement: Supplementary file 1 [file 17504939]

Table A1. Methodology, target industry and collaborative mechanism categories for each of the 404 contributions selected in this SLR

| Authors | Methodology | Industry | Collaborative Mechanism Categories | | | | | | |
| --- | --- | --- | --- | --- | --- | --- | --- | --- | --- |
| RM | JP | TISP | CEP | GP | AP | SCD |
| Abbasi et al. (2016) | Quantitative | Automotive | x | x |  |  | x |  |  |
| Acquaye et al. (2015) | Quantitative | Food |  |  | x |  | x | x |  |
| Adams (2008) | Qualitative | Food |  |  |  |  | x |  |  |
| Agarwal et al (2014) | Modelling | Electronic | x |  | x | x | x | x | x |
| Aguiar et al. (2013) | Qualitative | Diverse industries | x | x | x | x | x |  | x |
| Agyemang et al. (2018) | Quantitative | Food | x |  | x | x | x | x | x |
| Aid et al. (2017) | Qualitative | Diverse industries | x | x | x | x |  | x |  |
| Airike et al. (2016) | Qualitative | Electronic | x | x |  | x |  |  |  |
| Akhavan and Beckmann (2017) | Qualitative | Diverse industries | x | x | x | x | x | x | x |
| Alamar et al. (2017) | Qualitative | Food |  | x | x |  |  |  |  |
| Albino et al. (2012) | Quantitative | Diverse industries | x | x |  | x |  |  |  |
| Allaoui et al. (2018) | Quantitative | Food |  |  |  |  |  |  |  |
| Amaro and Barbosa-Póvoa (2013) | Modelling | Forest products | x | x |  |  |  |  |  |
| Amer and Eltawil (2014) | Lit. review | N/A | x | x |  | x |  |  | x |
| Amer and Eltawil (2015) | Lit. review | N/A | x | x |  | x |  |  | x |
| Antheaume et al. (2018) | Quantitative | Retail |  |  |  |  |  |  | x |
| Anthony and Ferroni (2012) | Case study | Food | x |  | x |  |  |  |  |
| Arroyo et al (2016) | Case study | Construction | x | x |  |  |  |  | x |
| Aschemann-Witzel et al. (2017) | Case study | Food | x |  |  | x |  |  |  |
| Awan et al. (2017) | Quantitative | Manufacturing |  | x |  |  | x |  |  |
| Azar et al. (2018) | Quantitative | Manufacturing | x | x | x | x | x |  | x |
| Azevedo et al. (2018) | Case study | Food | x | x | x | x | x | x |  |
| Bae (2017) | Quantitative | Diverse industries |  | x |  |  |  |  |  |
| Bai et al. (2012) | Modelling | Energy |  | x |  | x |  |  |  |
| Bai et al. (2017) | Quantitative | Mining/Metallurgy | x | x | x |  |  | x | x |
| Barari et al. (2012) | Modelling | Apparel | x |  | x | x | x |  |  |
| Barcellos de Paula and Gil-Lafuente (2018) | Quantitative | Manufacturing | x |  |  |  |  |  | x |
| Barnes and Mattsson (2016) | Quantitative | Diverse industries |  | x | x |  |  |  |  |
| Basiri and Heydari (2017) | Modelling | Retail | x | x |  | x | x |  |  |
| Bennekrouf et al (2011) | Modelling | N/A |  | x | x |  |  |  | x |
| Bennekrouf et al (2011b) | Modelling | N/A |  | x | x |  |  |  | x |
| Bernstein and Cashore (2007) | Qualitative | N/A | x | x |  | x | x |  |  |
| Bhattacharya et al (2014) | Quantitative | Manufacturing | x | x | x |  | x | x |  |
| Bi and Liu (2013) | Qualitative | Manufacturing | x | x | x | x |  |  |  |
| Bishop and Riopelle (2011) | Case study | Chemical | x |  |  |  |  | x | x |
| Bisogno (2016) | Qualitative | Food | x |  |  |  |  |  | x |
| Blanco et al. (2016) | Quantitative | Logistics |  |  |  |  |  | x |  |
| Blome et al. (2014) | Quantitative | Diverse industries | x | x |  |  | x |  |  |
| Bocken et al (2015) | Qualitative | Diverse industries | x | x |  |  | x | x |  |
| Bonou et al. (2016) | Quantitative | Energy |  |  |  |  |  | x | x |
| Boström et al. (2015) | Lit. review | N/A | x |  | x | x | x | x |  |
| Brinkley (2017) | Qualitative | Food |  |  |  |  | x |  | x |
| Brockhaus et al. (2013) | Qualitative | Diverse industries | x | x |  | x |  |  | x |
| Brown et al. (2007) | Case study | N/A | x |  | x | x | x |  |  |
| Bruckman et al. (2018) | Qualitative | Energy | x | x |  | x | x | x |  |
| Bucklew (2011) | Qualitative | Logistics |  |  | x | x |  |  | x |
| Burlingame and Pineiro (2007) | Qualitative | Food |  | x |  |  |  |  |  |
| Bustos and Moors (2018) | Qualitative | Food | x | x | x | x | x | x |  |
| Campos et al. (2017) | Quantitative | Diverse industries | x | x |  |  |  |  | x |
| Cao and Zhang (2013) | Modelling | N/A |  | x |  | x |  |  |  |
| Cao et al. (2015) | Modelling | N/A | x |  |  | x | x |  |  |
| Cao et al. (2017) | Case study | Apparel | x | x | x | x | x |  |  |
| Carballo-Penela et al. (2017) | Case study | Food | x | x | x | x | x | x | x |
| Centobelli et al. (2017) | Lit. review | Logistics | x | x | x |  | x |  |  |
| Chalmers and Archer (2011) | Qualitative | Energy | x | x | x | x | x | x |  |
| Chan (2007) | Quantitative | Packaging | x | x | x | x |  |  |  |
| Chan et al. (2012) | Quantitative | Diverse industries |  | x | x | x | x |  |  |
| Chen et al (2010) | Qualitative | Electronic | x | x | x | x | x | x | x |
| Chen et al. (2017) | Lit. review | N/A | x | x | x | x | x | x | x |
| Chen et al. (2019) | Quantitative | Diverse industries | x |  |  |  | x | x |  |
| Chenga (2011) | Quantitative | Construction | x |  | x |  |  |  |  |
| Cheung et al. (2009) | Qualitative | Diverse industries | x | x | x | x | x |  |  |
| Chin et al. (2015) | Qualitative | Manufacturing | x | x | x |  |  |  |  |
| Chkanikova (2015) | Case study | Food | x | x |  | x | x |  |  |
| Chopra and Wu (2016) | Quantitative | Electronic |  | x | x |  | x | x |  |
| Colicchia et al (2017) | Case study | Food | x | x | x | x | x | x | x |
| Costa et al. (2018) | Quantitative | Manufacturing | x |  |  |  |  | x | x |
| Costello (2011) | Qualitative | Construction | x | x | x | x | x |  |  |
| Dablanc et al (2011) | Case study | Transportation | x | x | x |  |  |  |  |
| Dai et al. (2015) | Quantitative | Diverse industries | x | x | x | x |  |  |  |
| Dai et al. (2017) | Quantitative | Diverse industries | x | x | x |  |  |  |  |
| Dale et al. (2016) | Qualitative | Energy | x | x | x | x | x |  |  |
| Dan et al. (2010) | Quantitative | N/A | x | x |  | x |  | x |  |
| Danese et al. (2018) | Quantitative | Diverse industries | x | x |  |  | x | x |  |
| Dangelico et al. (2013) | Quantitative | Forest products | x |  | x | x | x |  | x |
| Dania et al. (2018) | Lit. review | Food | x | x | x | x | x | x |  |
| Das and Balakrishnan (2010) | Case study | Energy | x | x | x | x | x | x | x |
| Davidson et al. (2014) | Qualitative | Food | x |  |  | x |  |  |  |
| De Giovanni and Vinzi (2012) | Quantitative | Diverse industries | x | x |  |  | x |  |  |
| De Giovanni and Vinzi (2014) | Quantitative | Diverse industries | x | x | x | x |  | x | x |
| De Man and Burns (2006) | Case study | Diverse industries | x | x | x | x | x | x | x |
| De Roest et al. (2017) | Case study | Food | x | x | x |  | x |  |  |
| De Sousa Jabbour et al. (2015) | Quantitative | N/A | x | x |  |  |  | x |  |
| De Souza et al. (2014) | Case study | Diverse industries | x |  | x | x |  |  |  |
| De Stefano and Montes-Sancho (2018) | Quantitative | Automotive | x | x | x |  |  |  | x |
| De Vargas Mores et al. (2018) | Case study | Chemical |  |  |  |  | x |  |  |
| Deans et al. (2018) | Case study | Food | x | x |  | x | x | x |  |
| Delmotte et al. (2016) | Modelling | Food | x | x | x |  |  |  |  |
| Den et al. (2018) | Quantitative | Electronic | x | x | x | x | x | x |  |
| Despoudi et al. (2018) | Quantitative | Food | x | x | x | x |  | x |  |
| D’Eusanio et al. (2018) | Case study | Food | x |  |  |  |  |  |  |
| Devaney and Henchion (2018) | Case study | Diverse industries | x | x | x | x | x | x | x |
| Dillon (2001) | Case study | Electronic | x | x | x |  | x |  | x |
| Ding (2018) | Lit. review | Pharmaceutical | x | x | x | x | x | x | x |
| Ding et al. (2015) | Modelling | Automotive |  | x |  | x | x |  |  |
| Ding, Huang and Tang (2018) | Modelling | Energy | x | x |  | x | x |  |  |
| Ding, Liu and Zheng (2016) | Modelling | Automotive |  |  |  | x | x |  | x |
| Ding, Wang and Zheng (2018) | Modelling | Automotive | x | x |  | x | x |  |  |
| Ding, Zhao et al. (2016) | Modelling | Automotive | x |  |  | x | x |  | x |
| Dissanayake and Sinha (2015) | Qualitative | Manufacturing | x | x |  |  |  | x | x |
| Dobson and Chakraborty (2018) | Modelling | Manufacturing | x | x |  | x | x |  |  |
| Dossou and Nachidi (2018) | Qualitative | Mining/Metallurgy |  |  | x |  |  |  |  |
| Dubey et al. (2018) | Quantitative | Automotive | x | x | x | x |  |  |  |
| Dunant et al. (2018) | Quantitative | Construction |  | x |  | x | x |  | x |
| Dunphy et al. (2016) | Qualitative | Construction | x | x | x | x | x | x |  |
| Egels-Zandén et al. (2015) | Case study | Apparel | x | x |  | x | x |  |  |
| Ellram and Golicic (2016) | Case study | Logistics | x |  | x | x | x | x |  |
| Fiorino and Bhan (2014) | Qualitative | Electronic | x | x | x | x | x | x |  |
| Fischer and Pascucci (2017) | Case study | Apparel | x | x | x | x | x |  | x |
| Fischer et al. (2016) | Qualitative | Automotive | x | x | x |  |  | x |  |
| Flint and Signori (2014) | Qualitative | Food | x | x | x |  |  |  |  |
| Flores et al (2008) | Case study | Diverse industries | x | x | x |  | x | x | x |
| Flygansvaer et al. (2018) | Quantitative | Electronic | x | x | x | x | x | x |  |
| Formentini and Taticchi (2016) | Case study | Diverse industries | x | x | x | x | x | x |  |
| Forsman et al. (2014) | Qualitative | Food | x | x |  | x | x | x | x |
| Franco (2017) | Case study | Manufacturing | x | x | x | x | x |  |  |
| Gallear et al. (2015) | Quantitative | Diverse industries | x | x | x | x | x | x |  |
| Galloway and Stoian (2007) | Case study | Forest products | x | x | x | x | x | x |  |
| Gardas et al. (2019) | Case study | Oil and gas | x | x | x |  | x | x |  |
| Gavronski et al. (2011) | Quantitative | Manufacturing | x | x | x |  |  | x | x |
| Germani et al. (2015) | Case study | Manufacturing | x |  | x |  |  |  | x |
| Ghadimi et al. (2017) | Modelling | Electronic | x | x | x |  |  | x | x |
| Ghosh (2019) | Quantitative | Manufacturing | x |  |  |  |  |  |  |
| Ghosh and Shah (2015) | Modelling | N/A | x | x |  | x |  |  |  |
| Gimenez et al. (2012) | Quantitative | Diverse industries |  | x |  |  | x | x |  |
| Glen and Hunter (2011) | Qualitative | Energy | x | x | x | x | x | x |  |
| Gloet and Samson (2019) | Case study | Food | x | x | x | x |  |  | x |
| Goh and Loosemore (2017) | Qualitative | Construction | x | x | x | x | x |  |  |
| Gokarn and Kuthambalayan (2017) | Qualitative | Food | x | x | x | x | x | x |  |
| Gold et al. (2010) | Lit. review | N/A | x | x | x | x | x |  |  |
| Gomez-Luciano et al. (2018) | Case study | Food | x |  | x |  | x |  |  |
| Gouda and Saranga (2018) | Quantitative | Manufacturing | x | x |  |  |  | x |  |
| Govindan et al. (2013) | Modelling | N/A | x | x |  |  |  |  | x |
| Govindan et al. (2019) | Quantitative | Electronic | x | x | x |  | x | x | x |
| Goyal et al. (2016) | Case study | Diverse industries | x |  | x |  | x |  | x |
| Graafland (2018) | Quantitative | Diverse industries | x | x | x |  |  | x |  |
| Green et al. (2012) | Quantitative | Manufacturing | x | x | x |  | x | x | x |
| Grekova et al. (2016) | Quantitative | Food | x | x | x | x |  |  |  |
| Grimm et al. (2016) | Case study | Diverse industries | x | x | x | x |  | x |  |
| Grimm et al. (2018) | Quantitative | Food | x | x | x | x | x | x | x |
| Grzybowska and Kovacs (2014) | Qualitative | Diverse industries | x | x |  |  | x |  | x |
| Grzybowska et al (2014) | Quantitative | Diverse industries | x | x | x | x | x |  |  |
| Guabiroba et al. (2017) | Quantitative | Oil and gas | x |  |  |  |  |  |  |
| Gunasekaran et al. (2015) | Lit. review | N/A | x | x |  | x |  |  |  |
| Gupta et al. (2018) | Qualitative | Diverse industries | x | x | x |  | x |  |  |
| Hajdul (2014) | Modelling | Diverse industries |  | x | x |  |  |  |  |
| Hall et al. (2013) | Qualitative | Logistics | x |  | x | x | x |  |  |
| Halloran et al. (2014) | Case study | Food | x | x | x | x | x | x |  |
| Hannibal and Kauppi (2019) | Qualitative | Diverse industries | x |  |  |  | x | x |  |
| Haraldsson and Johansson (2019) | Qualitative | Mining/Metallurgy | x | x | x |  |  | x |  |
| Hazelton et al. (2013) | Qualitative | Manufacturing | x |  | x | x | x |  |  |
| Herczeg et al. (2018) | Qualitative | Diverse industries | x | x | x | x | x | x | x |
| Heydari and Mosanna (2018) | Modelling | N/A |  | x |  |  | x |  |  |
| Hisjam et al. (2015) | Modelling | Forest products |  |  |  | x |  |  |  |
| Hsueh (2015) | Modelling | N/A | x |  | x | x | x |  |  |
| Hu et al. (2015) | Modelling | N/A | x |  | x |  |  |  |  |
| Huo et al. (2016) | Quantitative | Diverse industries | x |  |  | x |  |  |  |
| Huq et al (2016) | Case study | Manufacturing | x | x | x | x | x | x | x |
| Hussain et al. (2015) | Modelling | N/A | x | x | x | x | x | x |  |
| Huybrechts et al. (2018) | Case study | Diverse industries | x | x |  |  |  |  |  |
| Iacob (2015) | Qualitative | Forest products |  |  |  | x | x |  |  |
| Iacovidou et al. (2019) | Qualitative | Remanufacturing | x | x |  | x |  |  |  |
| Irani et al. (2017) | Quantitative | Energy | x | x | x | x | x | x |  |
| Jacobs and Singhal (2017) | Quantitative | Apparel |  | x |  | x | x | x |  |
| Jadhav et al. (2018) | Quantitative | Manufacturing | x | x | x |  | x | x |  |
| Jaegler and Burlat (2012) | Modelling | Manufacturing | x |  |  |  |  | x | x |
| Jakhar (2015) | Modelling | Apparel | x | x |  | x | x |  | x |
| Jamnadass et al. (2014) | Case study | Food |  | x | x | x | x | x |  |
| Jawad et al. (2017) | Modelling | N/A | x | x | x | x | x | x |  |
| Jernström et al. (2017) | Quantitative | Forest products |  |  |  |  |  |  |  |
| Jiang et al. (2016) | Qualitative | Oil and gas | x | x | x | x | x |  | x |
| Jira and Toffel (2013) | Quantitative | Diverse industries | x | x | x | x | x |  |  |
| Kang and Hwang (2017) | Qualitative | N/A | x | x | x | x | x | x |  |
| Kannan (2018) | Quantitative | Apparel | x |  | x | x |  | x | x |
| Kerr and Foster (2011) | Qualitative | Food |  | x | x |  | x |  |  |
| Khan et al. (2018) | Quantitative | Manufacturing |  | x | x | x | x | x | x |
| Kim and Rhee (2012) | Quantitative | Diverse industries | x | x | x |  | x | x |  |
| Kin et al. (2018) | Modelling | FMCG [[1]](#endnote-1) | x | x |  |  |  |  |  |
| Klassen and Vachon (2003) | Quantitative | Manufacturing | x | x | x | x | x |  |  |
| Klassen and Vereecke (2012) | Case study | Diverse industries | x | x | x | x | x | x |  |
| Koh et al. (2012) | Case study | Information Tech. | x |  |  |  | x |  |  |
| Korhonen et al. (2015) | Qualitative | Forest products | x | x |  |  |  | x |  |
| Kovács (2008) | Case study | Diverse industries | x | x |  |  |  | x |  |
| Kremer et al. (2016) | Modelling | Manufacturing |  |  |  |  |  |  |  |
| Kuik et al (2010) | Qualitative | N/A | x | x | x | x | x |  |  |
| Kuik et al (2011) | Qualitative | N/A | x | x | x | x | x | x |  |
| Kulak et al. (2016) | Case study | Food | x | x |  | x |  |  |  |
| Kumar and Malegeant (2006) | Case study | Apparel | x |  | x |  |  |  |  |
| Kumar and Rodrigues (2018) | Qualitative | Manufacturing | x |  |  |  |  |  |  |
| Kumar et al. (2018) | Quantitative | Diverse industries | x | x | x | x | x | x |  |
| Kumaraswamy et al (2004) | Qualitative | Construction |  | x | x |  | x | x | x |
| Kuo (2010) | Modelling | Electronic | x |  | x |  |  |  |  |
| Kuo et al (2014) | Case study | Manufacturing | x | x | x |  | x | x |  |
| Kurdve et al. (2015) | Case study | Manufacturing | x | x | x | x | x | x | x |
| Laari et al. (2016) | Quantitative | Manufacturing | x | x | x | x | x | x |  |
| Lambin and Thorlakson (2018) | Qualitative | Diverse industries |  |  |  | x | x |  |  |
| Le Dû and de Corbière (2011) | Qualitative | Retail |  |  | x |  | x |  | x |
| Leadbitter and Benguerel (2014) | Qualitative | Food | x | x |  | x | x | x |  |
| Lechler et al. (2019) | Qualitative | Diverse industries | x | x | x |  | x | x |  |
| Lee and Kim (2011) | Case study | Electronic | x | x |  | x | x |  |  |
| Lee et al (2014) | Case study | Manufacturing | x | x | x | x | x | x | x |
| Leigh and Li (2015) | Case study | Logistics | x |  | x |  | x | x | x |
| Leising et al. (2017) | Qualitative | Construction | x | x |  | x |  |  | x |
| Leitizia and Hendrikse (2016) | Modelling | Food | x |  |  | x |  |  | x |
| Lenny et al (2013) | Qualitative | Food | x | x | x | x | x | x | x |
| León-Bravo et al. (2017) | Case study | Food | x | x | x | x |  | x | x |
| Li and Found (2016) | Qualitative | N/A | x | x | x | x | x | x |  |
| Li et al (2010) | Case study | Retail | x | x | x | x | x | x | x |
| Lim and Phillips (2008) | Case study | Apparel |  | x | x | x | x |  |  |
| Lin (2013) | Modelling | Electronic | x | x |  | x |  |  |  |
| Lin et al. (2018) | Quantitative | Tourism | x |  |  |  | x |  | x |
| Lind et al. (2016) | Qualitative | Logistics | x | x | x | x | x | x | x |
| Ling et al (2014) | Quantitative | Construction | x | x | x | x | x | x | x |
| Liotta et al (2016) | Modelling | Automotive |  | x |  | x |  |  | x |
| Liu et al (2014) | Case study | Logistics |  | x | x | x | x |  | x |
| Liu et al. (2017) | Qualitative | Diverse industries | x | x | x | x | x | x |  |
| Lo (2015) | Case study | Electronic | x | x | x | x | x | x | x |
| Lokko et al. (2018) | Qualitative | Diverse industries | x | x |  |  |  |  |  |
| Luo et al. (2015) | Quantitative | Manufacturing | x | x | x | x |  | x |  |
| Luzzini et al. (2015) | Quantitative | Diverse industries | x |  | x | x | x | x | x |
| Macchion et al (2017) | Case study | Apparel | x | x | x | x | x | x | x |
| Macintosh et al. (2019) | Qualitative | Food | x | x | x | x | x |  | x |
| Madani and Rasti-Barzoki (2017) | Modelling | N/A |  | x |  | x | x |  |  |
| Mahony (2012) | Case study | Food | x |  |  |  | x |  |  |
| Malik et al. (2016) | Case study | Healthcare | x | x | x | x | x |  | x |
| Maloni and Benton (1997) | Lit. review | N/A | x | x | x | x |  | x | x |
| Manavalan and Jayakrishna (2019) | Qualitative | Manufacturing | x | x | x |  | x |  |  |
| Marconi et al (2017) | Quantitative | Apparel | x |  | x |  | x | x | x |
| Matt et al. (2014) | Case study | Construction | x | x |  |  | x |  |  |
| Mengistie et al. (2015) | Qualitative | Food |  | x | x | x | x |  |  |
| Miller and Pollard (2005) | Case study | Food | x | x | x | x |  |  |  |
| Mirhedayatian et al. (2014) | Modelling | Food |  |  |  |  |  |  |  |
| Mitra and Datta (2014) | Quantitative | Manufacturing | x | x | x | x | x | x | x |
| Mohseni et al. (2019) | Case study | Oil and gas | x | x | x |  | x | x |  |
| Molina-Besch and Pålsson (2016) | Case study | Diverse industries | x |  |  | x | x |  |  |
| Moore and Manring (2009) | Qualitative | Industry | x | x | x | x | x | x |  |
| Morais and Silvestre (2018) | Case study | Diverse industries | x |  | x | x | x |  |  |
| Morali and Searcy (2013) | Case study | Diverse industries | x |  | x | x | x | x |  |
| Mocillo-Bellido and Duran (2018) | Case study | Retail | x | x | x | x | x | x |  |
| Moreno-Peñaranda et al. (2015) | Case study | Oil and gas | x | x |  |  |  |  |  |
| Morose et al. (2011) | Case study | Electronic |  |  | x |  |  |  |  |
| Mourtzis et al. (2012) | Modelling | Automotive |  |  | x |  | x |  | x |
| Movahedipour et al. (2018) | Lit. review | Energy | x |  | x |  | x | x |  |
| Mulholland et al. (2018) | Qualitative | Logistics | x | x | x | x | x |  |  |
| Muller et al. (2012) | Case study | Food | x | x |  | x | x |  |  |
| Musa et al. (2014) | Lit. review | N/A | x | x | x | x |  |  |  |
| Nakano and Hirao (2011) | Case study | Diverse industries | x |  | x | x |  |  |  |
| Nasir et al (2016) | Qualitative | Remanufacturing | x | x | x |  | x |  |  |
| Nathanail et al. (2016) | Quantitative | Logistics | x | x | x | x | x | x | x |
| Nematollahi et al. (2017a) | Modelling | Pharmaceutical |  | x |  |  |  | x |  |
| Nematollahi et al. (2017b) | Modelling | N/A |  | x |  | x |  | x |  |
| Nematollahi et al. (2017c) | Modelling | Pharmaceutical |  | x | x | x | x |  |  |
| Neutzling et al. (2017) | Case study | Diverse industries | x | x | x | x | x | x |  |
| Newsome et al. (2014) | Qualitative | Food | x |  | x |  | x |  |  |
| Newton et al. (2013) | Lit. review | Food |  |  | x | x | x |  |  |
| Nie et al (2011) | Quantitative | Manufacturing | x | x | x | x | x |  |  |
| Niesten et al. (2017) | Qualitative | N/A | x |  |  |  | x |  |  |
| Nwaka (2005) | Case study | Pharmaceutical | x | x |  | x |  |  |  |
| O’Keeffe et al. (2016) | Case study | Construction | x |  | x | x | x | x |  |
| Oelze et al. (2014) | Qualitative | Diverse industries | x | x | x | x |  |  |  |
| Paddeu et al. (2018) | Qualitative | Logistics | x | x | x | x | x |  |  |
| Pakdeechoho and Sukhotu (2018) | Quantitatvie | Food | x | x | x | x | x | x | x |
| Panetto et al. (2019) | Qualitative | Manufacturing | x | x | x |  | x | x |  |
| Pant et al. (2015) | Case study | Food | x | x | x | x | x |  |  |
| Patala et al. (2014) | Lit. review | N/A | x | x | x | x | x |  |  |
| Patricio et al. (2018) | Case study | Food | x | x | x | x | x |  | x |
| Pehlken et al. (2016) | Qualitative | Energy | x |  |  | x |  |  | x |
| Pelli et al (2017) | Qualitative | Forest products | x | x | x | x | x | x |  |
| Perdana et al. (2018) | Case study | Food | x | x | x | x | x |  |  |
| Perdikakis et al. (2015) | Case study | N/A | x |  | x |  | x |  |  |
| Persson and Werner (2012) | Quantitative | Energy | x | x |  | x |  |  |  |
| Petrie (2007) | Qualitative | Mining/Metallurgy | x | x | x |  | x | x |  |
| Picciotti (2017) | Case study | Diverse industries |  | x | x |  | x |  |  |
| Piketty et al (2015) | Qualitative | Diverse industries | x | x | x | x | x | x |  |
| Pimenta and Ball (2015) | Lit. review | N/A | x | x | x |  | x | x |  |
| Pinto et al. (2018) | Case study | Food | x |  |  |  |  |  |  |
| Pishchulov et al. (2019) | Quantitative | Forest products | x | x | x | x | x | x | x |
| Pöltner and Grechenig (2010) | Qualitative | Retail | x | x | x |  | x |  |  |
| Postacchini et al. (2018) | Quantitative | Packaging | x | x |  |  |  |  |  |
| Poulsen and Lema (2017) | Case study | Energy |  | x | x |  | x |  |  |
| Prima Dania et al (2016) | Lit. review | Food | x | x | x | x | x | x | x |
| Pu (2018) | Qualitative | Tourism | x | x | x | x | x |  | x |
| Qian et al. (2017) | Qualitative | Manufacturing |  | x | x |  |  |  |  |
| Qorri et al. (2018) | Lit. review | Diverse industries | x |  | x |  |  | x |  |
| Rahimian et al. (2017) | Qualitative | Construction | x |  |  |  | x |  |  |
| Rai et al. (2018) | Qualitative | Logistics | x | x | x | x |  |  | x |
| Rakik and Rakik (2019) | Qualitative | N/A | x | x |  |  |  |  |  |
| Ramanathan et al. (2014) | Case study | Diverse industries | x | x | x | x |  |  |  |
| Ramani et al (2010) | Lit. review | Manufacturing | x | x | x |  | x | x | x |
| Ramos and Swart (2017) | Qualitative | Food | x | x |  | x | x | x | x |
| Ranjan and Jha (2019) | Modelling | N/A | x | x |  | x |  |  |  |
| Raut et al. (2019) | Quantitative | Food | x | x | x |  | x | x |  |
| Redwood et al. (2017) | Case study | Construction |  | x | x |  |  | x |  |
| Reefke and Sundaram (2017) | Qualitative | Diverse industries | x | x | x | x | x | x | x |
| Rehme et al (2015) | Qualitative | Energy | x | x | x | x | x |  |  |
| Réviron and Chappuis (2005) | Case study | Food | x | x |  | x | x | x |  |
| Richter and Bokelmann (2016) | Quantitative | Food | x |  | x | x |  |  |  |
| Rizzi et al. (2013) | Lit. review | N/A | x | x | x | x | x |  |  |
| Robinson et al (2013) | Qualitative | Soil | x | x | x | x | x | x |  |
| Rodger and George (2017) | Modelling | Energy |  |  | x | x | x |  |  |
| Rodríguez et al. (2016) | Case study | Diverse industries | x | x | x | x | x |  | x |
| Roldán et al. (2014) | Modelling | Logistics | x |  | x | x |  |  |  |
| Ross and Jayaraman (2009) | Modelling | Healthcare |  |  |  | x |  |  | x |
| Roy and Whelan (1992) | Case study | Electronic | x | x | x | x | x |  |  |
| Royer et al. (2017) | Case study | Food | x | x | x | x | x | x | x |
| Sahamie et al. (2013) | Lit. review | Diverse industries | x | x | x | x |  |  |  |
| Sancha et al. (2016) | Quantitative | Diverse industries | x | x |  |  |  | x |  |
| Sari (2010) | Modelling | N/A | x | x | x |  |  |  |  |
| Scheihing et al (2013) | Qualitative | Energy | x | x | x | x | x | x | x |
| Schenkel et al. (2015) | Lit. review | N/A | x | x | x | x | x |  |  |
| Schliephake et al (2009) | Qualitative | Diverse industries | x | x | x | x | x | x | x |
| Schniederjans and Hales (2016) | Quantitative | Information Tech. |  |  | x |  |  |  |  |
| Scholz et al. (2018) | Lit. review | Forest products | x | x | x | x |  |  | x |
| Secondi et al. (2015) | Quantitative | Food | x |  | x | x |  |  |  |
| Sellito et al. (2019) | Case study | Apparel | x | x |  |  | x | x |  |
| Seuring and Gold (2013) | Qualitative | N/A | x | x |  |  | x | x | x |
| Shanoyan et al. (2014) | Quantitative | Food |  |  |  | x | x |  |  |
| Shashi et al. (2018) | Quantitative | Food | x |  |  | x | x | x | x |
| Siddh et al (2017) | Lit. review | Food | x | x | x | x | x | x | x |
| Siddiqui and Raza (2015) | Lit. review | N/A | x | x | x |  | x | x | x |
| Sigala (2008) | Case study | Tourism |  | x | x | x | x | x | x |
| Silva et al. (2018) | Case study | Food | x | x | x | x | x | x | x |
| Silvestre et al. (2018) | Case study | Food | x | x |  |  | x |  |  |
| Sim and Prabhu (2017) | Modelling | Manufacturing |  | x |  | x |  |  |  |
| Sime (2005) | Qualitative | Healthcare | x | x |  | x | x |  |  |
| Singh et al (2015) | Qualitative | Food | x | x | x |  | x | x |  |
| Singh et al. (2016) | Case study | Automotive | x | x | x | x |  | x |  |
| Sippl (2015) | Qualitative | Mining/Metallurgy | x | x | x | x | x |  |  |
| Smith et al. (2017) | Qualitative | Energy | x |  | x | x | x |  | x |
| Sodhi and Tang (2018) | Lit. review | Diverse industries | x | x | x | x | x | x | x |
| Solakivi et al. (2013) | Quantitative | Diverse industries | x | x |  |  |  |  |  |
| Solér et al. (2010) | Case study | Food | x | x | x | x | x |  |  |
| Soni and Jain (2011) | Qualitative | N/A | x | x | x | x | x |  |  |
| Soysal (2016) | Modelling | Food |  |  |  |  |  | x |  |
| Soysal et al. (2018) | Modelling | Food | x | x | x |  | x |  |  |
| Steele and Feyerherm (2014) | Case study | Food |  | x | x | x |  |  | x |
| Stone et al (2011) | Case study | Forest products | x | x | x | x | x |  |  |
| Styles et al. (2012) | Quantitative | Retail | x |  |  |  | x |  | x |
| Tabrizi et al. (2017) | Modelling | Food |  | x |  | x | x |  |  |
| Talay et al. (2018) | Case study | Apparel | x | x | x |  | x | x |  |
| Tannous and Yoon (2018) | Lit. review | N/A | x | x | x | x | x | x |  |
| Tarandi (2015) | Qualitative | Construction | x |  | x | x | x |  |  |
| Teixeira et al. (2016) | Quantitative | Manufacturing | x | x |  |  | x |  |  |
| Tesfay (2014) | Case study | Oil and gas | x |  | x | x | x | x | x |
| Theiβen and Spinler (2014) | Quantitative | FMCG i | x | x | x | x | x | x | x |
| Theiβen et al. (2015) | Case study | Manufacturing | x | x | x | x | x |  |  |
| Thiffault et al (2015) | Qualitative | Forest products | x |  |  | x | x | x |  |
| Thorlakson et al. (2018) | Case study | Food | x |  |  | x | x | x | x |
| Tinoco et al. (2017) | Modelling | N/A | x | x | x | x | x |  |  |
| Torres-Ruiz and Ravindran (2017) | Quantitative | Manufacturing | x | x | x |  | x | x | x |
| Touboulic and Walker (2015) | Qualitative | Food | x | x | x | x | x | x |  |
| Trappey et al (2012) | Modelling | Electronic | x | x |  |  | x | x |  |
| Tseng and Bui (2017) | Quantitative | Apparel |  | x | x |  | x | x | x |
| Tseng et al. (2018) | Quantitative | Manufacturing | x | x | x |  |  |  |  |
| Tseng et al. (2019) | Lit. review | N/A | x | x | x |  | x | x | x |
| Tsoi (2010) | Case study | Apparel | x | x |  | x | x |  |  |
| Türkay et al. (2004) | Modelling | Energy |  | x |  |  |  | x |  |
| Umar et al. (2013) | Case study | Oil and gas |  |  |  | x |  |  |  |
| Vachon (2007) | Quantitative | Manufacturing | x | x | x | x |  | x |  |
| Vachon and Klassen (2006) | Quantitative | Packaging | x | x |  | x |  |  |  |
| Vachon and Klassen (2008) | Quantitative | Manufacturing | x | x |  |  |  |  |  |
| Van der Heijden and Cramer (2017) | Case study | Food | x | x | x | x | x | x | x |
| van der Horst and Vermeylen (2011) | Qualitative | Energy | x |  |  |  | x | x |  |
| Van Hoof and Lyon (2013) | Quantitative | Manufacturing | x |  | x | x |  |  |  |
| Van Hoof and Thiell (2014) | Quantitative | Diverse industries | x | x | x | x |  |  |  |
| van Hoof and Thiell (2015) | Quantitative | Diverse industries | x |  | x | x | x |  |  |
| van Lier et al (2016) | Modelling | Logistics | x | x | x | x |  |  | x |
| Veleva and Bodkin (2018) | Qualitative | Diverse industries | x |  | x | x | x | x | x |
| Venkatesh et al. (2017) | Quantitative | Transportation |  | x | x | x | x |  |  |
| Vrijhoef et al. (2014) | Qualitative | Construction | x | x | x | x | x |  | x |
| Vurro et al. (2009) | Qualitative | N/A | x | x |  | x | x |  |  |
| Waller et al. (2015) | Qualitative | N/A |  |  | x |  |  | x |  |
| Wan Ahmad et al. (2016) | Qualitative | Energy | x | x | x |  | x | x | x |
| Wang and Liu (2008) | Qualitative | Electronic | x | x | x | x | x |  |  |
| Wang and Ran (2018) | Qualitative | N/A | x | x | x | x | x | x |  |
| Wang et al. (2011) | Case study | Logistics | x |  | x | x | x |  |  |
| Wang et al. (2016) | Qualitative | N/A | x |  | x |  | x | x |  |
| Wang et al. (2018) | Modelling | Mining/Metallurgy |  |  | x | x |  |  | x |
| Werner et al. (2017) | Qualitative | Food | x | x | x |  | x |  | x |
| Wesana et al. (2018) | Quantitative | Food | x | x | x | x | x | x |  |
| Wiengarten and Longoni (2015) | Quantitative | Manufacturing | x | x | x | x | x |  |  |
| Wijen and Chiroleu-Assouline (2019) | Case study | Food | x | x |  |  | x | x |  |
| Wolfert et al. (2017) | Lit. review | Food |  |  | x |  |  |  |  |
| Wong, Susilawati et al. (2018) | Qualitative | Housing | x |  | x | x | x |  |  |
| Wong, Soh et al. (2018) | Quantitative | Logistics | x | x | x |  | x | x |  |
| Woo et al. (2016) | Quantitative | Construction | x | x | x | x |  |  |  |
| Wu et al (2016) | Quantitative | Electronic | x | x | x | x | x | x |  |
| Xing et al. (2016) | Qualitative | Apparel |  |  | x |  |  | x |  |
| Xu et al. (2018) | Quantitative | Electronic | x | x | x |  | x | x |  |
| Yan et al. (2016) | Quantitative | Electronic | x | x |  | x | x | x |  |
| Yang (2017) | Quantitative | Transportation | x | x | x |  | x | x |  |
| Yang and Lien (2018) | Quantitative | Diverse industries | x | x | x | x | x | x |  |
| Yang et al (2017) | Quantitative | Electronic | x | x | x | x | x | x | x |
| Yang et al. (2010b) | Quantitative | Energy | x | x | x | x | x | x |  |
| Yen (2018) | Quantitative | Electronic | x | x |  |  | x | x |  |
| Yenipazarli (2017) | Modelling | N/A | x | x |  | x |  |  |  |
| Youn et al. (2013) | Quantitative | Manufacturing | x |  | x | x |  |  |  |
| Ytterhus et al. (1999) | Qualitative | Food | x | x | x | x | x |  |  |
| Zailani et al (2012) | Quantitative | Manufacturing | x | x | x | x | x | x | x |
| Zander et al. (2016) | Case study | Forest products | x | x | x | x | x |  |  |
| Zhao et al. (2017) | Modelling | Remanufacturing | x | x | x | x | x |  |  |
| Zondag et al. (2017) | Case study | Food | x | x | x | x | x |  | x |
| Zortea et al. (2017) | Quantitative | Food | x | x |  |  |  |  |  |
| Zsidisin and Siferd (2001) | Lit. review | N/A | x | x | x | x | x | x |  |

1. FMCG : Fast moving consumer goods [↑](#endnote-ref-1)
